# Supplementary material for: Activated β-catenin Forces N2A Cell-derived Neurons Back to Tumor-like Neuroblasts and Positively Correlates with a Risk for Human Neuroblastoma
Source: PubMed Central journal article supplement — Int J Biol Sci. 2012 Jan 23;8(2):289–97. doi: 10.7150/ijbs.3520 (PMC3269611; doi:10.7150/ijbs.3520), 2012-01-23
Supplement: ijbsv08p0289s1.pdf [file ijbsv08p0289s1.pdf]

Supplementary figures

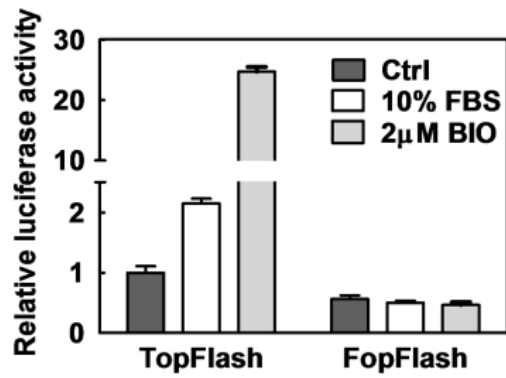

**Fig.S1 FBS and BIO stimulate Wnt/ $\beta$ -catenin activities**

N2A cells were induced to differentiate into neurons as previously described. Four days later, N2B27 medium was replaced by 10% FBS or added with 2µM BIO and N2A cells were transfected with TopFlash or Fopflash plasmids. The luciferase activities were analyzed 24 hours after transfection.

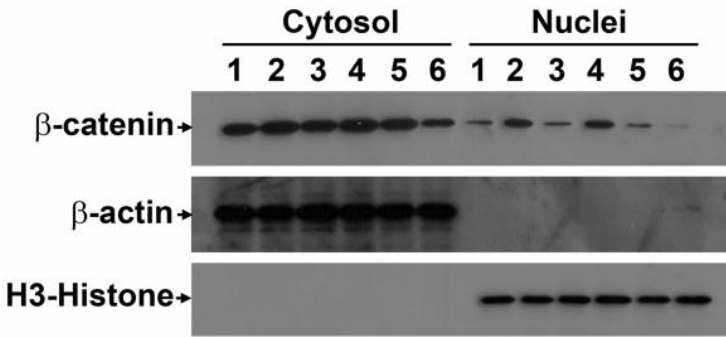

**Fig.S2 The expression levels of  $\beta$ -catenin protein in cytosol and nuclei**

After induction of N2A cells for 4 days, the cells were added with DMSO (lane 1) or BIO (lane 2), or transfected with GFP (lane 3), S33Y- $\beta$ -catenin (lane 4), ctrl siRNA (lane 5) or  $\beta$ -catenin siRNA. Cells were harvested for Western blot analysis at 24 hours after treatment or transfection. The expression of  $\beta$ -catenin protein in cytosol and nuclei was indicated.  $\beta$ -actin protein was used as a positive control for cytosol and negative control for nuclei, and H3-histone was used as a positive control for nuclei and negative control for cytosol.

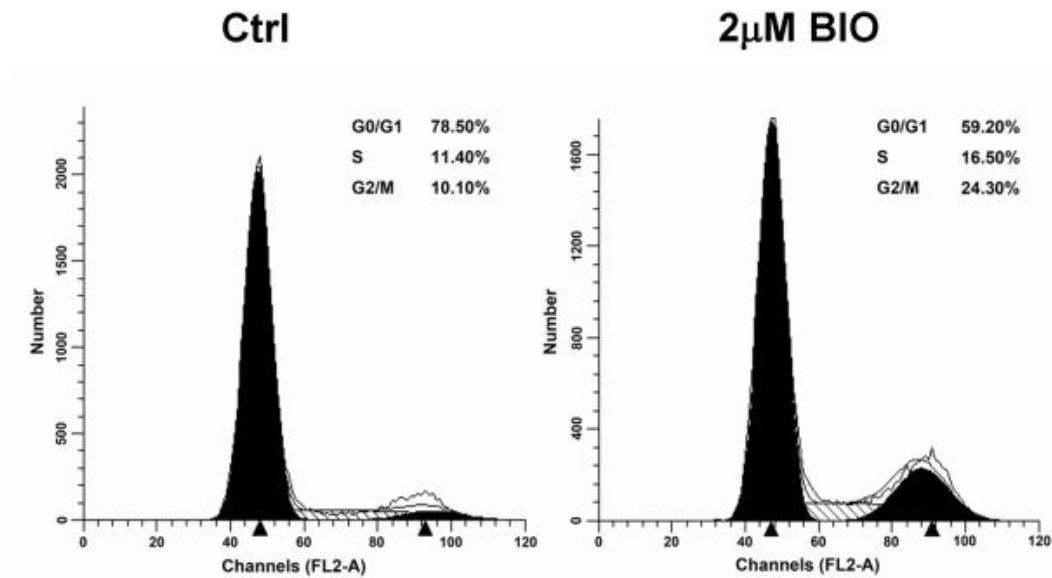

### Fig.S3 BIO promotes N2A cell-derived neurons to reenter cell cycle

Changes in the cell cycle of N2A cell-derived neurons after treatment with BIO or DMSO were analysed by PI staining and FACS.
